# Supplementary material for: A phase I/randomized phase II study of GM.CD40L vaccine in combination with CCL21 in patients with advanced lung adenocarcinoma
Source: Springer Nature journal article supplement (doi:10.1007/s00262-018-2236-7), 2018-09-12
Supplement: MOESM1 [file 16117218]

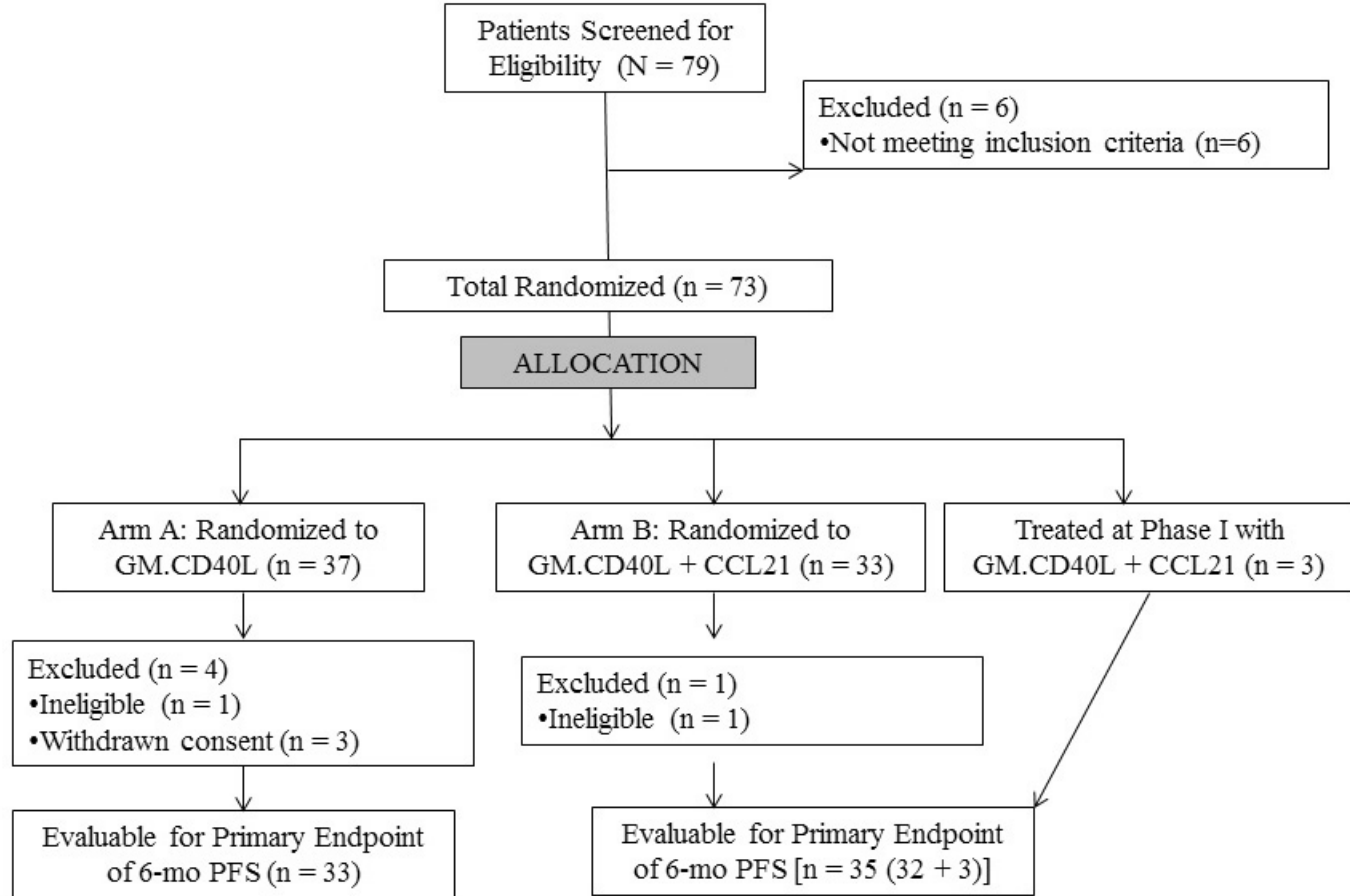

Supplemental figure 1
